# Supplementary material for: Binding region and interaction properties of sulfoquinovosylacylglycerol (SQAG) with human vascular endothelial growth factor 165 revealed by biosensor-based assays
Source: Royal Society of Chemistry journal article supplement (doi:10.1039/c1md00180a), 2011-01-01
Supplement: c1md00180a.pdf [file c1md00180a.pdf]

*Supplementary Information*

**Binding region and interaction properties of sulfoquinovosylacylglycerol (SQAG) with human vascular endothelial growth factor 165 revealed by biosensor based assays**

Yoichi Takakusagi<sup>a,b,c,#</sup>, Kaori Takakusagi<sup>a,b,c</sup>, Noriko Ida<sup>c</sup>, Mihoko Takami<sup>c</sup>, Yuki Matsumoto<sup>c</sup>, Tomoe Kusayanagi<sup>c</sup>, Tadashi Nakabayashi<sup>c</sup>, Satoko Aoki<sup>c</sup>, Hiroshi Murata<sup>c</sup>, Keisuke Ohta<sup>c</sup>, Fumio Sugawara<sup>a,b,c\*</sup>, Kengo Sakaguchi<sup>a,b,c\*</sup>

<sup>a</sup> Division of Social Collaboration, Research Institute for Science and Technology (RIST)

<sup>b</sup> Division of Chemical Biology, Research Institute for Science and Technology (RIST)

<sup>c</sup> Department of Applied Biological Science, Faculty of Science and Technology

Tokyo University of Science, 2641 Yamazaki, Noda, Chiba 278-8510, Japan

<sup>#</sup> Current affiliation: National Cancer Institute (NCI), National Institutes of Health (NIH), Bethesda, MD, USA

\*E-mail: sugawara@rs.noda.tus.ac.jp kengo@rs.noda.tus.ac.jp

|                                                                                                                |       |
|----------------------------------------------------------------------------------------------------------------|-------|
| <b>Experimental procedures</b>                                                                                 | S3-S8 |
| Growth factors and receptors used in this study ( <b>Table S1</b> )                                            | S9    |
| Specific primers for construction of T7 phage and recombinant hVEGF <sub>165</sub> segment ( <b>Table S2</b> ) | S10   |
| Raw DNA sequence data of del 1-4 phage ( <b>Table S3</b> )                                                     | S11   |
| Raw DNA sequence data of del 1-4 protein ( <b>Table S4</b> )                                                   | S12   |

|                                                                                                                       |        |
|-----------------------------------------------------------------------------------------------------------------------|--------|
| QCM based affinity selection of the T7 phage-displayed defined<br>segment of hVEGF <sub>165</sub> ( <b>Table S5</b> ) | S13    |
| Phage titer data from the binding assay between NRP1 and T7<br>phage-displayed HBD ( <b>Table S6</b> )                | S14    |
| SPR sensorgram between $\beta$ SQDG and growth factors and cognate<br>receptors ( <b>Figure S1</b> )                  | S15-17 |
| <b>References</b>                                                                                                     | S18    |

## Experimental Procedures

### Preparation of SQAG

$\beta$ SQDG (**1**) and six different analogues **2-7** (**Fig. 1**) were synthesized as previously described<sup>1</sup> and subjected to structure-binding analysis. All the compounds were >95% pure as judged by analytical HPLC and <sup>1</sup>H NMR analyses.<sup>1</sup>

### Proteins and reagents

Growth factors and receptors, which are shown in **Table S1**, were commercially obtained. T7select<sup>®</sup> system and expression vector were purchased from Novagen (Madison, HI).

### Instruments

A 27-MHz QCM device, AffinixQ and ceramic sensor chip were purchased from Initium Inc. (Tokyo, Japan). PCR was performed using a PTC-200 (Peltier Thermal Cycler) (Bio-Rad, Hercules, CA). Sequencing analysis was carried out using an ABI PRISM 3100 Genetic Analyzer (Applied Biosystems, Foster City, CA). Centrifugation was performed using a MX-201 centrifuge (TOMY Industry, Tokyo, Japan). SPR analysis was carried out using Biacore<sup>®</sup> 3000 with a sensor chip CM5 (GE Healthcare, Piscataway, NJ).

### Construction of T7 phage library displaying a fragment of hVEGF<sub>165</sub>

The hVEGF<sub>165</sub>-coding gene was partitioned into each domain, as shown in **Fig. 3**, and amplified by the polymerase chain reaction (PCR) using the primers shown in **Table S2**. The primers included recognition sites for *Eco*RI and *Hind*III to help facilitate the subsequent cloning steps. Each PCR product was subcloned into TA vector (Promega, Madison, WI) and the sequences were then

determined to ensure no mistakes had been introduced during amplification. The insert was double-digested with *EcoRI* and *HindIII*, and then inserted into the T7Select10-3b vector (Novagen), followed by *in vitro* packaging. The T7 phage (del 1-4) was amplified by host *E. coli* (BLT5615) to  $1.0 \times 10^9$  pfu ml<sup>-1</sup>, respectively. These solutions were mixed together in a 1:1 ratio and used as a T7 phage library.

### **Procedure for the T7 phage display selection using a cuvette type QCM device**

A 15 µl aliquot of βSQDG (**1**) (1 mM in DMSO) was dropped onto the gold electrode of the ceramic sensor chip that was immersed into bulk water and left for 5 min at room temperature (mean of immobilization amount: 1800 Hz (61.8 pmol)). The sensor chip was setup for the QCM device with the cuvette containing 8 ml of buffer (10 mM Tris-HCl, pH 8.0, 200 mM NaCl), which was constantly stirred at 1000 rpm. The QCM sensor was then allowed to fully stabilize. An aliquot of 8 µl of the T7 phage library ( $1.0 \times 10^9$  pfu ml<sup>-1</sup>) was then injected into the cuvette (final  $1.0 \times 10^6$  pfu ml<sup>-1</sup>). Frequency changes, caused by binding to the βSQDG immobilized on the gold electrode surface were then monitored for 10 min. For the recovery of bound phages, 20 µl of host *E. coli* culture was dropped onto the gold electrode and then incubated at 37 °C for 30 min. To the resulting solution was then added another 200 µl of LB medium. An aliquot of phage was then extracted from this solution and subjected to PCR analysis followed by DNA sequencing.

### **DNA sequencing**

DNA sequencing was performed as described previously.<sup>2</sup>

### **Construction of bacterial expression plasmids and expression of recombinant proteins**

As described above, the hVEGF<sub>165</sub> coding gene was partitioned into four fragments (del 1-4 **Fig. 2**).

Each fragment was amplified by PCR using the primers shown in **Table S2**. The primers contained *NdeI* and *XhoI* recognition sites that were used in further cloning experiments. PCR products were double-digested with *NdeI* and *XhoI* and then inserted into the expression vector pET28a(+) (Novagen). For the expression of protein, *Escherichia coli* BL21 (DE3) (Novagen) was used.

Single colonies were incubated in 100 ml LB medium containing 1% glucose and 50  $\mu\text{g ml}^{-1}$  of kanamycin, and cultured overnight at 37 °C. The cells were further cultured in 1000 ml of LB medium containing 1% glucose and 50  $\mu\text{g ml}^{-1}$  of kanamycin for 3 h at 30 °C. After adding isopropyl- $\beta$ -D-thiogalactoside (IPTG) at a final concentration of 1 mM, the cells were incubated for 3 h at 30 °C to induce heterologous gene expression. The cultured cells were harvested by centrifugation at 5000 g for 15 min at 4 °C.

#### **Procedure of recombinant hVEGF<sub>165</sub> polypeptide**

Cultured cells expressing each fragment were resuspended in binding buffer (20 mM phosphate buffer, pH 7.4 containing 500 mM NaCl, 10 mM imidazole, 5 mM 2-mercaptoethanol, 0.1 mM leupeptin, 0.1 mM pepstatin and 1 mM PMSF). Following sonication and centrifugation, the supernatant was purified by Ni<sup>2+</sup> chelation affinity chromatography. The recombinant protein obtained from this procedure was used in the kinetic analysis involving a surface plasmon resonance (SPR) biosensor.

#### **SDS-PAGE, tricine-SDS-PAGE and Western blot analysis**

The SDS-PAGE or tricine-SDS-PAGE (for recombinant del 4 polypeptide) analyses were performed using 10% or 15% SDS polyacrylamide gels with CBB staining. For Western blot analysis, purified proteins were first separated on each polyacrylamide gel and then transferred to PVDF membranes. The membranes were incubated with a polyhistidine (His $\times$ 6) mouse monoclonal

antibody (SIGMA-ALDRICH). Anti-mouse IgG conjugated with alkaline phosphatase (AP) (SIGMA-ALDRICH) was used as the secondary antibody. Antigen and antibody binding was detected using BCIP/NBT solution.

### SPR analysis

An analysis of binding between SQAGs and protein was performed using an SPR biosensor (Biacore®3000, GE healthcare). Protein was diluted 1:9 with 10 mM sodium acetate buffer at pH 4 or 5 and immobilized by an amine coupling reaction on a sensor chip CM5 (Biacore AB). The chip surface was activated by injecting a solution containing 200 mM *N*-ethyl-*N*'-dimethylaminopropyl carbodiimide (EDC) and 50 mM *N*-hydroxysuccinimide (NHS) at a flow rate of 10  $\mu\text{l min}^{-1}$  for 14 min. Protein was then injected and the coupling to the sensor surface was monitored. The surface was then blocked by injecting 1 M ethanolamine at pH 8.5 for 14 min. The amount of immobilized protein is given in **Table S1**. Various concentrations of analyte (**1, 2, 6, 7**: 0, 0.125, 0.25, 0.5, 1 and 2  $\mu\text{M}$ , **3-5**: 0, 1.25, 2.5, 5, 10 and 20  $\mu\text{M}$ ) in HBS-EP (10 mM HEPES, pH 7.4, 150 mM NaCl, 3 mM EDTA, 0.005% Surfactant P20)–8% DMSO were perfused at a flow rate of 20  $\mu\text{l min}^{-1}$  at 25 °C. At least two replicate experiments were performed for each protein. Kinetic parameters were obtained by global fitting of the sensorgrams to a 1:1 drifted baseline model using BIAevaluation 3.2 software (Biacore AB).

### Binding assay between T7 phage-displayed HBD and NRP1 using a cuvette type QCM device

A 15  $\mu\text{l}$  aliquot of NRP1 (100  $\mu\text{g ml}^{-1}$ ) was dropped onto the gold electrode of the ceramic sensor chip that was immersed into bulk water and left for 30 min at room temperature (mean of immobilization amount: 600 Hz (200  $\text{pmol}$ ). The sensor chip was setup for the QCM device with the cuvette containing 8 ml of buffer (10 mM Tris–HCl, pH 8.0, 200 mM NaCl), which was

constantly stirred at 1000 rpm. The QCM sensor was then allowed to fully stabilize. An aliquot of 8  $\mu\text{l}$  of the T7 phage that displays HBD ( $1.0 \times 10^9$  pfu  $\text{ml}^{-1}$ ) was then injected into the cuvette (final  $1.0 \times 10^6$  pfu  $\text{ml}^{-1}$ ). Frequency changes, caused by binding to the NRP1 immobilized on the gold electrode surface were then monitored for 10 min. The following process was carried out according to the procedure for the T7 phage display selection as described above.

### Description of the kinetics

Saturation binding kinetics between SQAG and protein immobilized on a sensor chip CM5 can be described as i) Scatchard-plot or ii) Hill-plot represented by following equations:

$$\text{i) } R_{\text{eq}} \cdot [\text{SQAG}]^{-1} = R_{\text{max}} \cdot K_{\text{D}} - R_{\text{eq}} \cdot (K_{\text{D}})^{-1}$$

$$\text{ii) } \log [R_{\text{eq}} \cdot (R_{\text{max}} - R_{\text{eq}})^{-1}] = n \log [\text{SQAG}] + \log (K_{\text{D}})^{-1}$$

where [SQAG] is the concentration of SQAG;  $R_{\text{eq}}$  is the response (RU) on equilibrium between SQAG and immobilized VEGF on a sensor chip CM5, which was obtained from curve fitting;  $R_{\text{max}}$  is the maximum response (RU);  $K_{\text{D}}$  is the dissociation constant between SQAG and immobilized protein;  $n$  is the Hill coefficient.<sup>3</sup>

Binding kinetic parameters can be written as the time-dependence of the response increase. The binding between SQAG and VEGF is as follows:

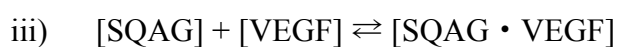

$$k_{\text{a}} = [\text{SQAG} \cdot \text{VEGF}] \cdot \{[\text{SQAG}] \cdot [\text{VEGF}]\}^{-1}, \quad k_{\text{d}} = \{[\text{SQAG}] \cdot [\text{VEGF}]\} \cdot [\text{SQAG} \cdot \text{VEGF}]^{-1},$$

$$K_{\text{D}} = k_{\text{d}} \cdot (k_{\text{a}})^{-1}$$

$$\text{iv) } [\text{SQAG} \cdot \text{VEGF}]_t = [\text{SQAG} \cdot \text{VEGF}]_{\infty} \cdot \{1 - \exp(-t \cdot \tau^{-1})\}$$

$$\text{v) } \tau^{-1} = k_a \cdot [\text{SQAG}] + k_d$$

where [VEGF] is the concentration of VEGF; [SQAG · VEGF] is the concentration of complex of SQAG and VEGF;  $k_a$  is association rate constant between SQAG and VEGF;  $k_d$  is dissociation rate constant;  $\tau$  is relaxation time, which can be obtained from non-linear curve fitting.<sup>3</sup>



**Table S1** Growth factors and receptors used in this study.

| <b>Protein<br/>(human)</b> |                  | <b>MW (kDa)</b>   | <b>Amino acid</b> | <b>Immobilized<br/>amount (RU)</b> | <b>R<sub>max</sub><br/>(RU)<sup>a</sup></b> |
|----------------------------|------------------|-------------------|-------------------|------------------------------------|---------------------------------------------|
| VEGF <sub>165</sub>        | R&D Systems      | 19.1              | A1-R165           | 9916                               | 453                                         |
| VEGF <sub>121</sub>        | R&D Systems      | 14                | A1-R121           | 3836                               | 239                                         |
| del 1                      |                  | 12.7              | A1-R110           | 4847                               | 333                                         |
| del 2                      |                  | 6.5               | A111-R165         | 2844                               | 382                                         |
| del 3                      |                  | 3.7               | A111-T142         | 860                                | 203                                         |
| del 4                      |                  | 2.8               | C137-R165         | 2219                               | 692                                         |
| VEGFR1                     | R&D Systems      | 60.7              | S27-I328          | 7000                               | 101                                         |
| VEGFR2                     | Acris antibodies | 116               | A20-E764          | 13600                              | 102                                         |
| NRP1                       | R&D Systems      | 90                | M1-K644           | 9680                               | 94                                          |
| TGFβ <sub>2</sub>          | Peprtech         | 25                | A1-S112           | 4251                               | 148                                         |
| TGFβ RII                   | R&D Systems      | 18                | M1-D159           | 10359                              | 503                                         |
| IGF-I                      | Peprtech         | 7.6               | G49-A118          | 656                                | 75                                          |
| IGF-I R                    | R&D Systems      | 102.9             | E31-N932          | 4724                               | 40                                          |
| FGF1                       | Peprtech         | 15.8              | M1-D141           | 3040                               | 168                                         |
| FGF2                       | Peprtech         | 17.2              | A1-S154           | 4116                               | 209                                         |
| FGF R2α                    | R&D Systems      | 66                | R22-E378          | 6373                               | 84                                          |
| Ang-1                      | Acris antibodies | 66                | N21-F496          | 2942                               | 39                                          |
| Tie-2                      | R&D Systems      | 100               | A23-K745          | 11267                              | 98                                          |
| EphB2 <sup>b</sup>         | R&D Systems      | 85.3              | V27-K548          | 7474                               | 77                                          |
| EphB4                      | R&D Systems      | 57.9              | L16-A539          | 2615                               | 39                                          |
| EGF                        | Peprtech         | 6.2               | N1-R53            | 596                                | 84                                          |
| EGFR                       | R&D Systems      | 68.6              | L25-S645          | 14622                              | 186                                         |
| PDGF-BB                    | Peprtech         | 12                | S1-T110           | 3857                               | 281                                         |
| PDGFRB                     | Abnova Corp.     | 36.7 <sup>c</sup> | L33-E133          | 5017                               | 119                                         |
| BMP-2                      | Peprtech         | 26                | M1-R115           | 4084                               | 137                                         |
| BMP RII                    | R&D Systems      | 41.5              | A26-I151          | 7245                               | 152                                         |
| sDLL-4                     | Peprtech         | 54                | S1-P498           | 3781                               | 61                                          |
| Jagged-1                   | R&D Systems      | 180               | S32-S1046         | 3187                               | 15                                          |
| Notch-1                    | R&D Systems      | 80.1              | A19-Q526          | 3885                               | 42                                          |
| DNA polymerase λ (Cont.)   |                  | 14.3              | M1-R95            | 1614                               | 100                                         |

<sup>a</sup>Calculated maximum response when 100% bound by βSQDG with 1:1 stoichiometry.  $R_{\max} = (\text{Immobilized amount of protein (RU)}) / (\text{MW of protein}) \times (\text{MW of } \beta\text{SQDG})$ . <sup>b</sup>The mouse PDGFRB was used. <sup>c</sup>This MW includes fusion GST tag. RU: resonance unit. 1RU = 1 pg mm<sup>-2</sup>.

**Table S2** Specific primers for construction of T7 phage and recombinant hVEGF<sub>165</sub> segment.

|         | Name     |      | Nt | Sequence                                  |
|---------|----------|------|----|-------------------------------------------|
| Phage   | del 1    | up   | 28 | <u>GAATTC</u> TGCACCCATGGCAGAAGGAGGA      |
|         | del 1    | down | 29 | AAGCTTTCATCTATCTTTCTTTGGTCTGC             |
|         | del 2, 3 | up   | 27 | <u>GAATTC</u> TGCAAGACAAGAAAATCCCTG       |
|         | del 2, 4 | down | 25 | AAGCTTTCACCGCCTCGGCTTGTCA                 |
|         | del 3    | down | 29 | AAGCTTTCATGTGTTTTTGCAGGAACATT             |
|         | del 4    | up   | 27 | <u>GAATTC</u> TTCTGCAAAAACACAGACTC        |
| Protein | del 1    | up   | 29 | <u>GGAATTC</u> CATATGGCACCCATGGCAGAAG     |
|         | del 1    | down | 32 | GGCCTCGAGTCATCTATCCTTCTTTGGTCTGC          |
|         | del 2, 3 | up   | 33 | <u>GGAATTC</u> CATATGGCAAGACAAGAAAATCCCTG |
|         | del 2, 4 | down | 26 | CCGCTCGAGTCACCGCCTCGGCTTGT                |
|         | del 3    | down | 29 | CCGCTCGAGTCATGTGTTTTTGCAGGAAC             |
|         | del 4    | up   | 29 | <u>CCCATATG</u> TCCTGCAAAAACACAGACTCG     |

\* Underlined nucleotide sequences represent the following recognition sites of restriction enzyme; **GAATTC**: *EcoRI*, **AAGCTT** : *HindIII*, **CATATG** : *NdeI*, **CTCGAG** : *XhoI*.

**Table S3** Raw DNA sequence data of del 1-4 phage.

| del | Sequence   |            |            |            |            |            |            |            |     |            |            |            |
|-----|------------|------------|------------|------------|------------|------------|------------|------------|-----|------------|------------|------------|
| 1   | ATG        | CTC        | GGG        | GAT        | <u>CCG</u> | <u>AAT</u> | <u>TCT</u> | GCA        | CCC | ATG        | GCA        | GAA        |
|     | GGA        | GGA        | GGG        | CAG        | AAT        | CAT        | CAC        | GAA        | GTG | GTG        | AAG        | TTC        |
|     | ATG        | GAT        | GTC        | TAT        | CAG        | CGC        | AGC        | TAC        | TGC | CAT        | CCA        | ATC        |
|     | GAG        | ACC        | CTG        | GTG        | GAC        | ATC        | TTC        | CAG        | GAG | TAC        | CCT        | GAT        |
|     | GAG        | ATC        | GAG        | TAC        | ATC        | TTC        | AAG        | CCA        | TCC | TGT        | GTG        | CCC        |
|     | CTG        | ATG        | CGA        | TGC        | GGG        | GGC        | TGC        | TGC        | AAT | GAC        | GAG        | GGC        |
|     | CTG        | GAG        | TGT        | GTG        | CCC        | ACT        | GAG        | GAG        | TCC | AAC        | ATC        | ACC        |
|     | ATG        | CAG        | ATT        | ATG        | CGG        | ATC        | AAA        | CCT        | CAC | CAA        | GGC        | CAG        |
|     | CAC        | ATA        | GGA        | GAG        | ATG        | AGC        | TTC        | CTA        | CAG | CAC        | AAC        | AAA        |
|     | TGT        | GAA        | TGC        | AGA        | CCA        | AAG        | AAA        | GAT        | AGA | <b>TGA</b> | <u>AAG</u> | <u>CTT</u> |
|     | GCG        | GCC        | GCA        | CTC        | GAG        | TAA        |            |            |     |            |            |            |
|     | 2          | ATG        | CTC        | GGG        | GAT        | <u>CCG</u> | <u>AAT</u> | <u>TCT</u> | GCA | AGA        | CAA        | GAA        |
| CCC |            | TGT        | GGG        | CCT        | TGC        | TCA        | GAG        | CGG        | AGA | AAG        | CAT        | TTG        |
| TTT |            | GTA        | CAA        | GAT        | CCG        | CAG        | ACG        | TGT        | AAA | TGT        | TCC        | TGC        |
| AAA |            | AAC        | ACA        | GAC        | TCG        | CGT        | TGC        | AAG        | GCG | AGG        | CAG        | CTT        |
| GAG |            | TTA        | AAC        | GAA        | CGT        | ACT        | TGC        | AGA        | TGT | GAC        | AAG        | CCG        |
| AGG |            | CGG        | <b>TGA</b> | <u>AAG</u> | <u>CTT</u> | GCG        | GCC        | GCA        | CTC | GAG        | TAA        |            |
| 3   | ATG        | CTC        | GGG        | GAT        | <u>CCG</u> | <u>AAT</u> | <u>TCT</u> | GCA        | AGA | CAA        | GAA        | AAT        |
|     | CCC        | TGT        | GGG        | CCT        | TGC        | TCA        | GAG        | CGG        | AGA | AAG        | CAT        | TTG        |
|     | TTT        | GTA        | CAA        | GAT        | CCG        | CAG        | ACG        | TGT        | AAA | TGT        | TCC        | TGC        |
|     | AAA        | AAC        | ACA        | <b>TGA</b> | <u>AAG</u> | <u>CTT</u> | GCG        | GCC        | GCA | CTC        | GAG        | TAA        |
| 4   | ATG        | CTC        | GGG        | GAT        | <u>CCG</u> | <u>AAT</u> | <u>TCT</u> | TCC        | TGC | AAA        | AAC        | ACA        |
|     | GAC        | TCG        | CGT        | TGC        | AAG        | GCG        | AGG        | CAG        | CTT | GAG        | TTA        | AAC        |
|     | GAA        | CGT        | ACT        | TGC        | AGA        | TGT        | GAC        | AAG        | CCG | AGG        | CGG        | <b>TGA</b> |
|     | <u>AAG</u> | <u>CTT</u> | GCG        | GCC        | GCA        | CTC        | GAG        | TAA        |     |            |            |            |

\* Underlined nucleotide sequences represent the following recognition sites of restriction enzyme; **GAATTC**: *EcoRI*, **AAGCTT** : *HindIII*. **TGA**: stop codon.

**Table S4** Raw DNA sequence data of del 1-4 protein.

| del | Sequence   |            |            |            |            |            |            |            |            |     |     |            |
|-----|------------|------------|------------|------------|------------|------------|------------|------------|------------|-----|-----|------------|
| 1   | ATG        | GGC        | AGC        | AGC        | CAT        | CAT        | CAT        | CAT        | CAT        | CAC | AGC | AGC        |
|     | GGC        | CTG        | GTG        | CCG        | CGC        | GGC        | AGC        | <u>CAT</u> | <u>ATG</u> | GCA | CCC | ATG        |
|     | GCA        | GAA        | GGA        | GGA        | GGG        | CAG        | AAT        | CAT        | CAC        | GAA | GTG | GTG        |
|     | AAG        | TTC        | ATG        | GAT        | GTC        | TAT        | CAG        | CGC        | AGC        | TAC | TGC | CAT        |
|     | CCA        | ATC        | GAG        | ACC        | CTG        | GTG        | GAC        | ATC        | TTC        | CAG | GAG | TAC        |
|     | CCT        | GAT        | GAG        | ATC        | GAG        | TAC        | ATC        | TTC        | AAG        | CCA | TCC | TGT        |
|     | GTG        | CCC        | CTG        | ATG        | CGA        | TGC        | GGG        | GGC        | TGC        | TGC | AAT | GAC        |
|     | GAG        | GGC        | CTG        | GAG        | TGT        | GTG        | CCC        | ACT        | GAG        | GAG | TCC | AAC        |
|     | ATC        | ACC        | ATG        | CAG        | ATT        | ATG        | CGG        | ATC        | AAA        | CCT | CAC | CAA        |
|     | GGC        | CAG        | CAC        | ATA        | GGA        | GAG        | ATG        | AGC        | TTC        | CTA | CAG | CAC        |
|     | AAC        | AAA        | TGT        | GAA        | TGC        | AGA        | CCA        | AAG        | AAA        | GAT | AGA | <b>TGA</b> |
|     | <u>CTC</u> | <u>GAG</u> | CAC        | CAC        | CAC        | CAC        | CAC        | CAC        | TGA        | GAT | CCG | GCT        |
|     | GCT        | AA         |            |            |            |            |            |            |            |     |     |            |
| 2   | ATG        | GGC        | AGC        | AGC        | CAT        | CAT        | CAT        | CAT        | CAT        | CAC | AGC | AGC        |
|     | GGC        | CTG        | GTG        | CCG        | CGC        | GGC        | AGC        | <u>CAT</u> | <u>ATG</u> | GCA | AGA | CAA        |
|     | GAA        | AAT        | CCC        | TGT        | GGG        | CCT        | TGC        | TCA        | GAG        | CGG | AGA | AAG        |
|     | CAT        | TTG        | TTT        | GTA        | CAA        | GAT        | CCG        | CAG        | ACG        | TGT | AAA | TGT        |
|     | TCC        | TGC        | AAA        | AAC        | ACA        | GAC        | TCG        | CGT        | TGC        | AAG | GCG | AGG        |
|     | CAG        | CTT        | GAG        | TTA        | AAC        | GAA        | CGT        | ACT        | TGC        | AGA | TGT | GAC        |
|     | AAG        | CCG        | AGG        | CGG        | <b>TGA</b> | <u>CTC</u> | <u>GAG</u> | CAC        | CAC        | CAC | CAC | CAC        |
|     | CAC        | TGA        | GAT        | CCG        | GCT        | GCT        | AA         |            |            |     |     |            |
| 3   | ATG        | GGC        | AGC        | AGC        | CAT        | CAT        | CAT        | CAT        | CAT        | CAC | AGC | AGC        |
|     | GGC        | CTG        | GTG        | CCG        | CGC        | GGC        | AGC        | <u>CAT</u> | <u>ATG</u> | GCA | AGA | CAA        |
|     | GAA        | AAT        | CCC        | TGT        | GGG        | CCT        | TGC        | TCA        | GAG        | CGG | AGA | AAG        |
|     | CAT        | TTG        | TTT        | GTA        | CAA        | GAT        | CCG        | CAG        | ACG        | TGT | AAA | TGT        |
|     | TCC        | TGC        | AAA        | AAC        | ACA        | <b>TGA</b> | <u>CTC</u> | <u>GAG</u> | CAC        | CAC | CAC | CAC        |
|     | CAC        | CAC        | TGA        | GAT        | CCG        | GCT        | GCT        | AA         |            |     |     |            |
| 4   | ATG        | GGC        | AGC        | AGC        | CAT        | CAT        | CAT        | CAT        | CAT        | CAC | AGC | AGC        |
|     | GGC        | CTG        | GTG        | CCG        | CGC        | GGC        | AGC        | <u>CAT</u> | <u>ATG</u> | TCC | TGC | AAA        |
|     | AAC        | ACA        | GAC        | TCG        | CGT        | TGC        | AAG        | GCG        | AGG        | CAG | CTT | GAG        |
|     | TTA        | AAC        | GAA        | CGT        | ACT        | TGC        | AGA        | TGT        | GAC        | AAG | CCG | AGG        |
|     | CGG        | <b>TGA</b> | <u>CTC</u> | <u>GAG</u> | CAC        | CAC        | CAC        | CAC        | CAC        | CAC | TGA | GAT        |
|     | CCG        | GCT        | GCT        | AA         |            |            |            |            |            |     |     |            |

\* **CATATG** : *Nde*I, **CTCGAG** : *Xho*I. **TGA**: stop codon.

**Table S5** QCM-based affinity selection of the T7 phage-displayed defined segment of hVEGF<sub>165</sub>.

| Clone                | Parent library | Selection |        |        |
|----------------------|----------------|-----------|--------|--------|
|                      |                | 1         | 2      | 3      |
| 1                    | del 1          | del 2     | del 4  | del 4  |
| 2                    | del 4          | del 4     | del 3  | del 4  |
| 3                    | del 3          | del 3     | del 4  | del 4  |
| 4                    | del 3          | del 1     | del 3  | del 4  |
| 5                    | del 3          | del 4     | del 4  | del 4  |
| 6                    | del 4          | del 4     | del 4  | del 4  |
| 7                    | del 4          | del 3     | del 4  | del 4  |
| 8                    | del 3          | del 1     | del 3  | del 4  |
| 9                    | del 2          | del 2     | del 2  | del 4  |
| 10                   | del 3          | del 3     | del 2  | del 4  |
| 11                   | del 1          | del 4     | del 2  | del 4  |
| 12                   | del 1          | del 3     | del 2  | del 4  |
| 13                   | del 2          | del 3     | del 2  | del 4  |
| 14                   | del 4          | del 4     | del 4  | del 4  |
| 15                   | del 3          | del 3     | del 3  | del 4  |
| 16                   | del 4          | del 2     | del 2  | del 4  |
| 17                   | del 4          | del 4     | del 1  | del 4  |
| 18                   | del 4          | del 2     | del 1  | del 4  |
| 19                   | del 3          | del 4     | del 4  | del 4  |
| 20                   | del 3          | del 4     | del 2  | del 4  |
| 21                   | del 1          | del 4     | del 3  | del 4  |
| 22                   | del 3          | del 2     | del 4  | del 4  |
| 23                   | del 4          | del 4     | del 3  | del 4  |
| 24                   | del 4          | del 3     | del 2  | del 2  |
| <hr/>                |                |           |        |        |
| del 1 ( <i>n</i> )   | 4              | 2         | 2      | 0      |
| del 1 (%)            | 16.7           | 8.3       | 8.3    | 0      |
| (vs. parent library) | (1)            | (0.5)     | (0.5)  | (0)    |
| <hr/>                |                |           |        |        |
| del 2 ( <i>n</i> )   | 2              | 5         | 8      | 1      |
| del 2 (%)            | 8.3            | 20.8      | 33.3   | 4.2    |
| (vs. parent library) | (1)            | (2.5)     | (4.0)  | (0.5)  |
| <hr/>                |                |           |        |        |
| del 3 ( <i>n</i> )   | 9              | 7         | 6      | 0      |
| del 3 (%)            | 37.5           | 29.2      | 25.0   | 0      |
| (vs. parent library) | (1)            | (0.78)    | (0.67) | (0)    |
| <hr/>                |                |           |        |        |
| del 4 ( <i>n</i> )   | 9              | 10        | 8      | 23     |
| del 4 (%)            | 37.5           | 41.7      | 33.3   | 95.8   |
| (vs. parent library) | (1)            | (1.11)    | (0.89) | (2.56) |

**Table S6** Phage titer data from the binding assay between NRP1 and T7 phage-displayed HBD.

|                          | <b>Rescued del 2 phage titer (pfu ml<sup>-1</sup>)</b> |                          |                           |
|--------------------------|--------------------------------------------------------|--------------------------|---------------------------|
|                          | <b>Vehicle</b><br>(DMSO)                               | <b>1</b><br>(1 μM βSQDG) | <b>4</b><br>(10 μM αSQMG) |
|                          | 42500                                                  | 9300                     | 270                       |
|                          | 76000                                                  | 21900                    | 3420                      |
|                          | 49500                                                  | 10000                    | 2765                      |
| Means                    | 56000                                                  | 13733                    | 2152                      |
| % (vehicle vs. compound) | 100                                                    | 24.5                     | 3.8                       |
| S.D.                     | 18.2                                                   | 7.3                      | 1.7                       |

**Figure S1** SPR sensorgram between  $\beta$ SQDG (**1**) and human growth factors and cognate receptors. Each protein was immobilized on sensor chip CM5 by an amine coupling reaction and various concentrations of **1** (0.125-2  $\mu$ M) were injected. Association: 120 sec, dissociation: 120 sec. Response curves were generated by subtraction of the background signals generated simultaneously on the control flow cell (protein non-immobilized cell), the injection of vehicle, and bulk response by DMSO. (A) VEGFR1. (B) VEGFR2. (C) NRP1. (D) TGF $\beta$ 2. (E) TGF $\beta$  RII. (F) IGF-1. (G) IGF-1 R. (H) FGF1. (I) FGF2. (J) FGF R2 $\alpha$ . (K) Ang-1. (L) Tie-2. (M) EphB2. (N) EphB4. (O) EGF. (P) EGFR. (Q) PDGF-BB. (R) Mouse PDGFRB. (S) BMP-2. (T) BMP RII. (U) sDLL-4. (V) Jagged-1. (W) Notch-1. (X) DNA polymerase  $\lambda$  fragment as a control. RU: resonance unit. 1 RU =  $1\text{pg mm}^{-2}$ .

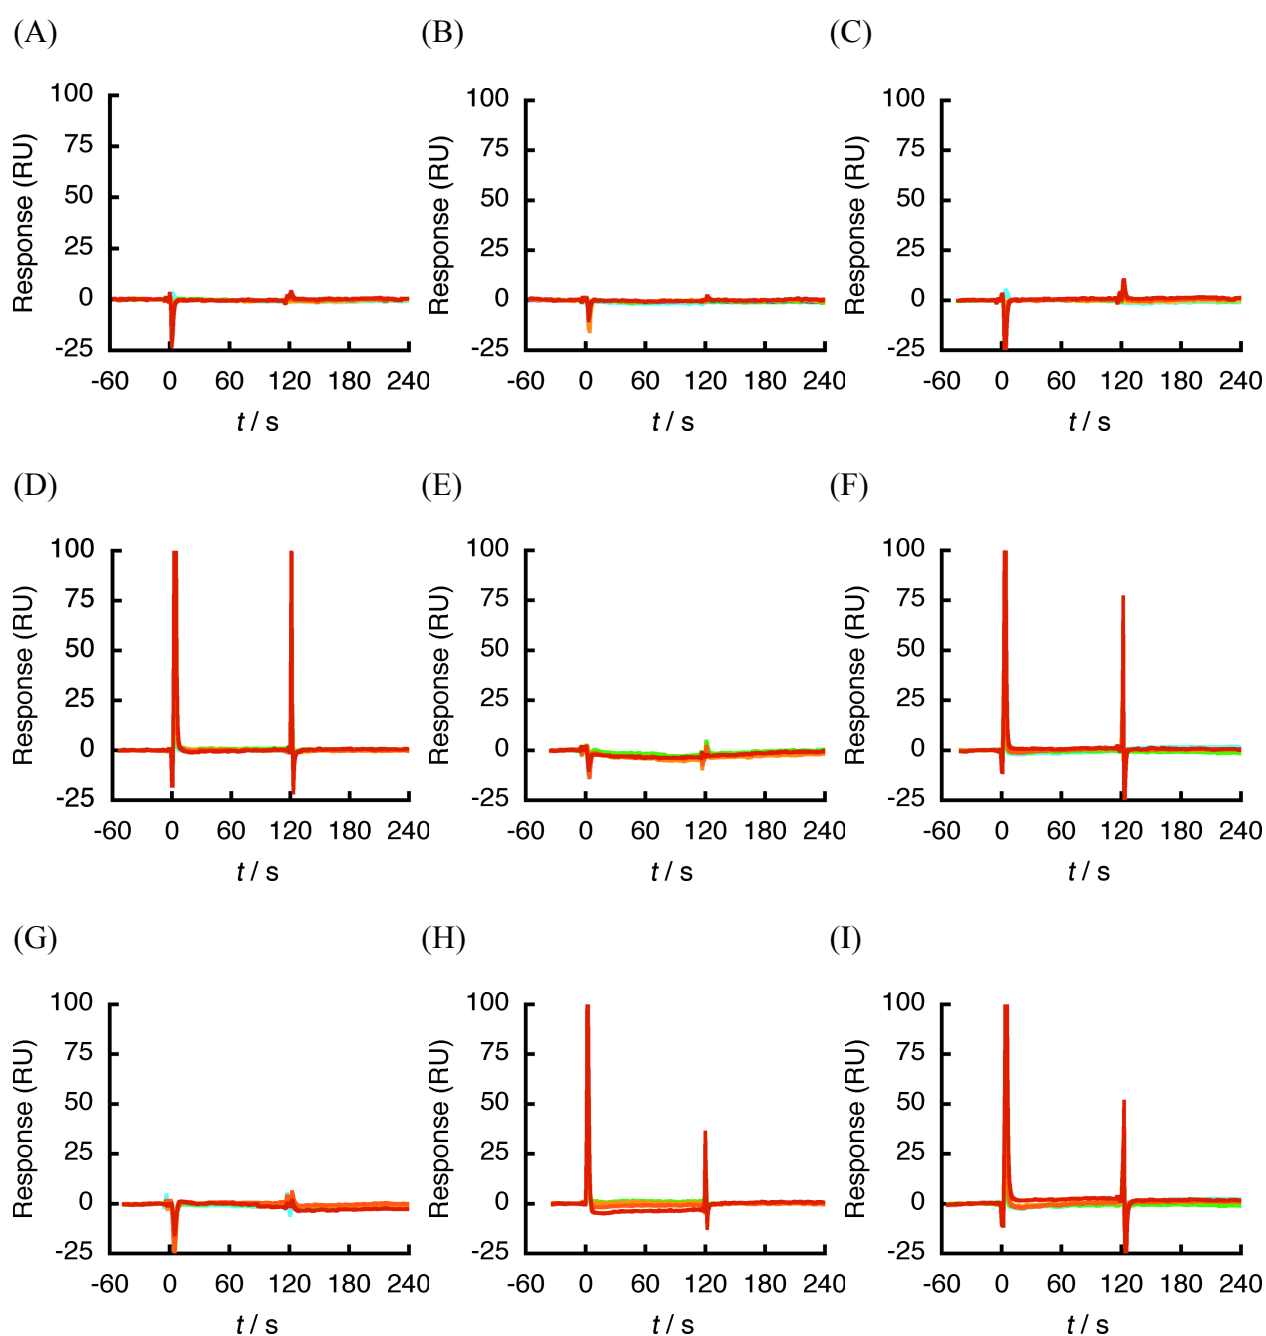

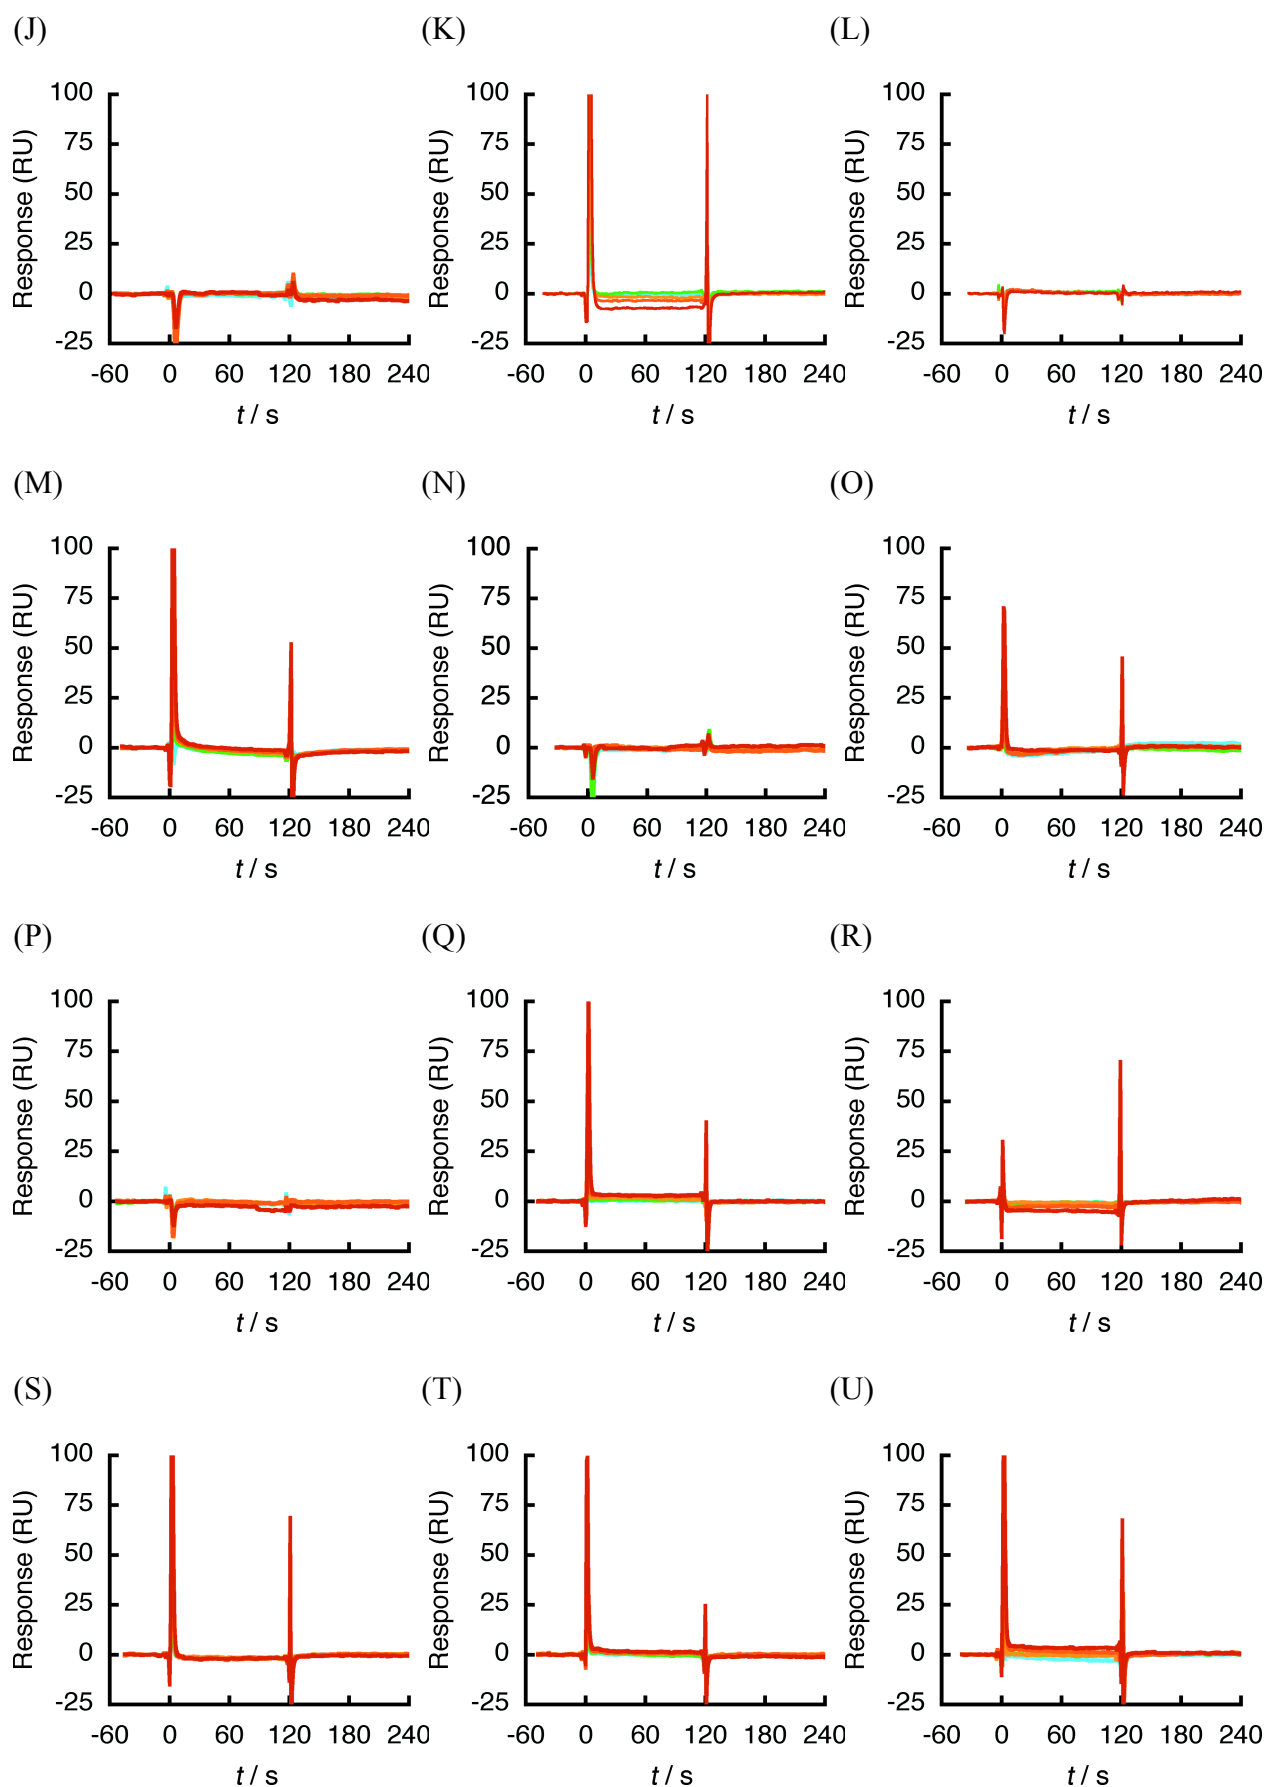



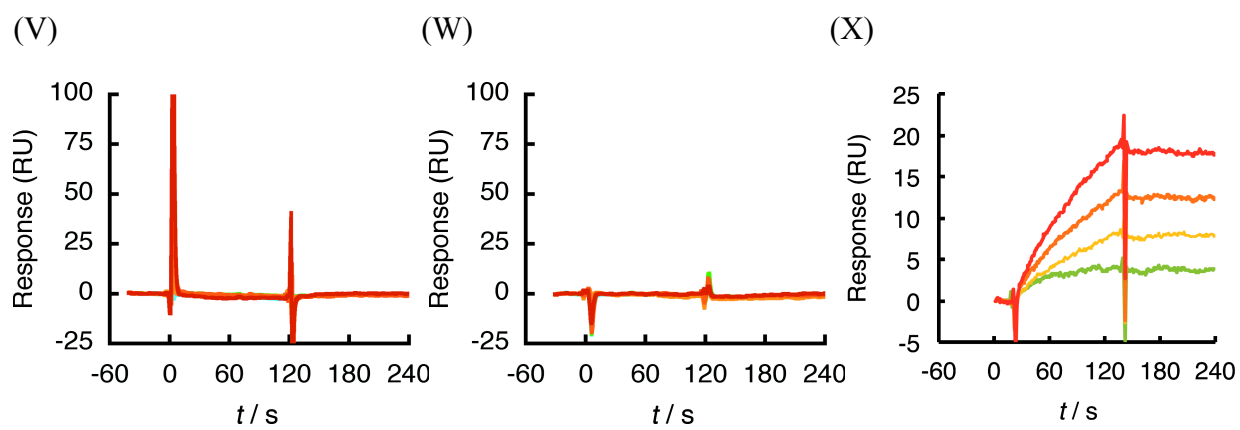

## References

1. S. Hanashima, Y. Mizushima, T. Yamazaki, K. Ohta, S. Takahashi, H. Sahara, K. Sakaguchi and F. Sugawara, *Bioorg. Med. Chem.*, 2001, **9**, 367-376.
2. Y. Takakusagi, K. Takakusagi, K. Kuramochi, S. Kobayashi, F. Sugawara and K. Sakaguchi, *Bioorg. Med. Chem.*, 2007, **15**, 7590-7598.
3. K. Takakusagi, Y. Takakusagi, K. Ohta, S. Aoki, F. Sugawara and K. Sakaguchi, *Protein Eng. Des. Sel.*, 2010, **23**, 51-60.
